# Supplementary material for: LncRNA PCSK1N-202 regulates CD34 + hematopoietic cells proliferation in MDS patients via PIM2/HIF-1alpha
Source: Research Square preprint supplement (doi:10.21203/rs.3.rs-3177358/v1), 2023-07-31
Supplement: Supplementary file 1 [file 7dc4ef86b56e4891c3bf7b93.docx]

|  |  |  |
| --- | --- | --- |
| Sample_name | Raw_reads | Clean_reads |
| AL_1 | 107012398 | 106492256 |
| AL_2 | 91396332 | 88087844 |
| AL_3 | 84945852 | 82523496 |
| AL_4 | 81769098 | 79537822 |
| AL_5 | 81831156 | 79539288 |
| BCL_1 | 83491892 | 82934636 |
| MDS_1 | 93489136 | 89856386 |
| MDS_2 | 87361514 | 84439168 |
| MDS_3 | 82215284 | 80875542 |
| MDS_4 | 104962776 | 102788690 |
| MDS_5 | 88320246 | 85681026 |
| MDS_6 | 86980916 | 85135800 |
| MDS_7 | 84496808 | 82338714 |
| WZH | 101859322 | 101086768 |
| ZHC | 91870384 | 91213460 |
| ZL_419 | 84659816 | 83975694 |
| ZL_AML | 98034232 | 94556104 |
